# Supplementary material for: Gendered Barriers and Opportunities for Women Smallholder Farmers in the Contagious Caprine Pleuropneumonia Vaccine Value Chain in Kenya
Source: MDPI journal article supplement (doi:10.3390/ani12081026), 2022-04-14
Supplement: s1 [file s1]

**Table S1.** Supporting Information files.

| Domains                                                                                                                                                               | Subthemes                    | Codes                                                             |
|-----------------------------------------------------------------------------------------------------------------------------------------------------------------------|------------------------------|-------------------------------------------------------------------|
| 1. Laws, Policies, Regulations and Institutional Practices (The Chain Empowerment matrix)                                                                             |                              | Gender / identity of government veterinary workers                |
|                                                                                                                                                                       | Institutional practices      | Influence of institutional practices                              |
|                                                                                                                                                                       |                              | Cooperation                                                       |
|                                                                                                                                                                       |                              | Private sector                                                    |
|                                                                                                                                                                       |                              | Religious practices                                               |
|                                                                                                                                                                       |                              | Support/aid programs                                              |
|                                                                                                                                                                       |                              | Government engagement                                             |
|                                                                                                                                                                       | Policy interventions         | Intervention (policy, programs, etc.)                             |
|                                                                                                                                                                       | Veterinary policy            | Veterinary role in vaccine administration/VVC                     |
|                                                                                                                                                                       |                              | Practices/policies to include female veterinarians in school      |
|                                                                                                                                                                       | Vaccine Policy               | Limited vaccines registered by law                                |
|                                                                                                                                                                       | Accountability of government | Local/public administration                                       |
|                                                                                                                                                                       | Regulations                  | Disposal of dead animals                                          |
|                                                                                                                                                                       | Barriers                     |                                                                   |
|                                                                                                                                                                       | Opportunities                | Cooperation                                                       |
| 2. Access to and Control over Assets and Resources (including income, employment, and assets such as land) (Harvard Analytical Frame-work, Gender Empowerment matrix) | Access                       | Access to resources                                               |
|                                                                                                                                                                       |                              | Access to finances                                                |
|                                                                                                                                                                       |                              | Access to opportunity                                             |
|                                                                                                                                                                       |                              | Access to education                                               |
|                                                                                                                                                                       |                              | Access to social assets                                           |
|                                                                                                                                                                       |                              | Access to human capital                                           |
|                                                                                                                                                                       |                              | Access to physical environment                                    |
|                                                                                                                                                                       |                              | Access to personal assets                                         |
|                                                                                                                                                                       |                              | Access to livestock                                               |
|                                                                                                                                                                       |                              | Access to technology                                              |
|                                                                                                                                                                       |                              | Access to leadership positions for women                          |
|                                                                                                                                                                       | Barriers to access           | Drivers license                                                   |
|                                                                                                                                                                       |                              | Transportation / moto not comfortable for women                   |
|                                                                                                                                                                       |                              | Livestock mortality as a barrier to economic success              |
|                                                                                                                                                                       | Control                      | Control over human capital (skills one has, knowledge and skills) |

|                                                                                         |                       |                                                                 |
|-----------------------------------------------------------------------------------------|-----------------------|-----------------------------------------------------------------|
|                                                                                         |                       | Control over resources                                          |
|                                                                                         |                       | Control over social assets (networking, groups)                 |
|                                                                                         |                       | Control over finances                                           |
|                                                                                         |                       | Control and decision making over family                         |
|                                                                                         |                       | Control and decision making over goats                          |
|                                                                                         |                       | Control over personal assets                                    |
|                                                                                         |                       | Control over physical environment                               |
|                                                                                         |                       | Control over opportunities                                      |
|                                                                                         | Barriers to control   |                                                                 |
|                                                                                         | Opportunities         |                                                                 |
| 3. Gender Roles, Responsibilities and Time Use (Caroline Moser Gender Roles Frame-work) |                       | Dependence of women on men                                      |
|                                                                                         |                       | Ability to multitask                                            |
|                                                                                         |                       | Women and men spend their time differently                      |
|                                                                                         |                       | Gender roles                                                    |
|                                                                                         | Allies                | Male allies                                                     |
|                                                                                         | Time availability     | Time availability for women                                     |
|                                                                                         | Animal type ownership | Chicken                                                         |
|                                                                                         |                       | Goat                                                            |
|                                                                                         | Biology               | Pregnancy                                                       |
|                                                                                         |                       | Access of women to agrovets positions                           |
|                                                                                         |                       | Difficulty to adopt roles that are not usual for this gender    |
|                                                                                         | Barriers              | Job opportunities                                               |
|                                                                                         | Opportunities         | Prioritizing girls vs. boys                                     |
|                                                                                         |                       | Gender-based opportunity                                        |
| 4. Cultural Norms and Beliefs (Force-field analysis)                                    |                       | Women are weak/have no control                                  |
|                                                                                         |                       | Hanging cultural norms                                          |
|                                                                                         |                       | Impact of misogyny on women                                     |
|                                                                                         |                       | Community norms and beliefs                                     |
|                                                                                         |                       | Consequences of norms and beliefs                               |
|                                                                                         |                       | Judgement of women based on decisions to use resources          |
|                                                                                         |                       | Men's perceptions of women buying drugs                         |
|                                                                                         |                       | Influence of support program on family culture and gender norms |

|                                                                                                                                 |                |                                                                             |
|---------------------------------------------------------------------------------------------------------------------------------|----------------|-----------------------------------------------------------------------------|
|                                                                                                                                 | Relationships  | Power struggle                                                              |
|                                                                                                                                 |                | Marital conflict                                                            |
|                                                                                                                                 |                | Comparing and measuring success of wives                                    |
|                                                                                                                                 |                | Relationship/communication between husband and wife                         |
|                                                                                                                                 | Barriers       |                                                                             |
|                                                                                                                                 | Opportunities  |                                                                             |
|                                                                                                                                 |                | Gender norms and becoming female importer                                   |
|                                                                                                                                 |                | Female role models encourage more female involvement                        |
|                                                                                                                                 |                | Prioritizing education for girls vs. boys                                   |
|                                                                                                                                 |                | Female Farmers cultural norms and use of vaccines and raise animals         |
|                                                                                                                                 |                | Auto marginalization                                                        |
|                                                                                                                                 |                | Women as animal keepers                                                     |
|                                                                                                                                 |                | Girls preference in term of education                                       |
| 5. Patterns of Power and Decision-making (Household decision-making models- Unitary and collective/cooperative conflict models) | Decision roles | Women's decision making and control over family                             |
|                                                                                                                                 |                | Decision making power to choose to become female veterinarian               |
|                                                                                                                                 |                | Opinion about why men allow women to have control and decision-making power |
|                                                                                                                                 |                | Strategies to influence husband's control and decision making               |
|                                                                                                                                 |                | Influence of communication on men's control and decision making             |
|                                                                                                                                 |                | Barrier to women having control and decision-making power                   |
|                                                                                                                                 |                | Influence of culture and beliefs on men's control and decision making       |
|                                                                                                                                 |                | Strategies to influence husband's control and decision making               |
| 6. Education, training and skills                                                                                               | Training       | Benefits of training                                                        |
|                                                                                                                                 |                | Trained community members                                                   |
|                                                                                                                                 |                | Benefits of training women to provide veterinary care                       |
|                                                                                                                                 |                | Access to training for women                                                |
|                                                                                                                                 |                | Training on vaccination                                                     |
|                                                                                                                                 |                | SMS and technology training                                                 |
|                                                                                                                                 |                | Empowerment training                                                        |
|                                                                                                                                 |                | Training of advisors                                                        |
|                                                                                                                                 | Education      | Access to education for women                                               |
|                                                                                                                                 |                | Benefits of education/training women                                        |
|                                                                                                                                 |                | Education for girls                                                         |
|                                                                                                                                 | Knowledge      | Lack of knowledge on vaccine and vaccination                                |

|                                                |                     |                                                                      |
|------------------------------------------------|---------------------|----------------------------------------------------------------------|
|                                                |                     | Lack of Knowledge on livestock health and management                 |
|                                                | Barriers            | Access to information barrier                                        |
|                                                |                     | Barriers to women participating in training and education            |
|                                                | Opportunities       | Opportunities for training to improve access and control over assets |
|                                                | Sensitization       |                                                                      |
|                                                | Group organization  | Group structure and organization                                     |
|                                                |                     | Culture of community groups based on gender structure                |
|                                                |                     | Group formation                                                      |
|                                                |                     | Benefits of participation in groups                                  |
|                                                |                     | Building group capital                                               |
|                                                |                     | Challenges for women's groups                                        |
|                                                |                     | Group activities                                                     |
|                                                |                     | Aspirations for participation in groups                              |
|                                                |                     | Goat ownership facilitated by groups                                 |
|                                                |                     | Consequences to group membership                                     |
|                                                |                     | Influence of group membership on family culture                      |
|                                                |                     | Control over group membership                                        |
|                                                |                     | Negative consequence of group membership                             |
| 7. Livestock ownership, disease and prevention | Vaccination         | Goat vaccination                                                     |
|                                                |                     | Cold chain                                                           |
|                                                |                     | Access to goat vaccines                                              |
|                                                |                     | Access to drugs / vaccine                                            |
|                                                |                     | Vaccine packaging                                                    |
|                                                |                     | Type of vaccines                                                     |
|                                                |                     | Cost of vaccine                                                      |
|                                                |                     | Source of vaccines                                                   |
|                                                |                     | Lack of vaccines                                                     |
|                                                |                     | Access form women to VVC                                             |
|                                                | Veterinary services | Access to veterinary services                                        |
|                                                |                     | Gender/identity of veterinarian                                      |
|                                                |                     | Distance to livestock health services                                |
|                                                |                     | Lack of veterinary extension services                                |
|                                                |                     | Equipment (storage transport)                                        |

|                |                        |                                                                      |
|----------------|------------------------|----------------------------------------------------------------------|
|                | Disease management     | Herbal and other treatment modes                                     |
|                |                        | Poultry disease management                                           |
|                |                        | Goat disease management                                              |
|                |                        | Causes and symptoms of poultry diseases                              |
|                |                        | Causes and symptoms of goat diseases                                 |
|                |                        | Alternative NCD/ CCPP treatment                                      |
|                | Ownership of livestock | Goat ownership facilitated by groups                                 |
|                |                        | Goat ownership                                                       |
|                |                        | Challenges to raising goats                                          |
|                |                        | Barriers to raising goats: poverty                                   |
|                |                        | Goat breeds                                                          |
|                |                        | Barriers to goat ownership for women                                 |
|                |                        | Goat husbandry and management practices                              |
|                |                        | Calendar for chicken mortality                                       |
|                |                        | Benefits to raising chickens                                         |
|                |                        | Control over livestock                                               |
|                |                        | Barriers to access and control over livestock                        |
|                |                        | Opportunities for training to improve access and control over assets |
|                |                        | Mortality of goats                                                   |
|                |                        | Mortality of chickens                                                |
| 8. Empowerment |                        | Desire for empowerment                                               |
|                |                        | Women's empowerment                                                  |
|                |                        | Priorities of empowered women                                        |
|                |                        | Benefits to empowering women                                         |
|                |                        | Barriers to empowerment for women - cultural beliefs                 |
|                |                        | Opportunities to improve respect of women                            |
|                |                        | Control over self                                                    |
|                |                        | Self esteem / women's confidence                                     |
|                | Barriers               | Lack of role models                                                  |
|                | Opportunities          | Training                                                             |
